# Supplementary material for: Altered microbiota, fecal lactate, and fecal bile acids in dogs with gastrointestinal disease
Source: PLoS One. 2019 Oct 31;14(10):e0224454. doi: 10.1371/journal.pone.0224454 (PMC6822739; doi:10.1371/journal.pone.0224454)
Supplement: S1 Formula Calculator — (XLSX) [file pone.0224454.s001.xlsx]

## Sheet: dilution factor calculator
Dilution Factor Calculation
Date:
			Fecal aliquot				unadjusted concentrations		D-lactate		L-lactate		D/L-lactate total
Well ID	Patient ID	Internal ID	Weight (mg)	fluid content	Pre-Dilution of sample	Sample volume in the test (ul)	D-lactate (g/L)	L-lactate (g/L)	Concen-tration (g/l)	Concentration (mM)	Concen-tration (g/l)	Concentration (mM)	Concentration (g/L)	Concentration (mM)
3D	Scooby Doo	SPL1	125	0.73	34.3298	100	0.003	0.015915	0.102989	1.15589	0.546359	6.13197	0.649348	7.28786
