# Supplementary material for: Altered microbiota, fecal lactate, and fecal bile acids in dogs with gastrointestinal disease
Source: PLOS journal article supplement (doi:10.1371/journal.pone.0224454), 2019-10-31
Supplement: S5 (10.1371/journal.pone.0224454.s005) [file journal.pone.0224454.s005]

**S2 Table.** Dilutional parallelism of seven fecal samples. Observed-to-expected ratios are in bold and the minimum, maximum, mean, and standard deviation of those observed-to-expected ratios are provided in the box at the end of the table.

|                 | D-lactate |       |            | L-lactate |       |            | total lactate |       |            |
|-----------------|-----------|-------|------------|-----------|-------|------------|---------------|-------|------------|
| <b>Sample 1</b> | O         | E     | <b>OE%</b> | O         | E     | <b>OE%</b> | O             | E     | <b>OE%</b> |
| S1              | HIGH      |       |            | HIGH      |       |            |               |       |            |
| S1 1:2          | HIGH      | N/A   | N/A        | HIGH      | N/A   | N/A        | N/A           | N/A   | N/A        |
| S1 1:4          | 0.047     | N/A   | N/A        | HIGH      | N/A   | N/A        | N/A           | N/A   | N/A        |
| S1 1:10         | 0.021     | 0.019 | <b>112</b> | HIGH      | N/A   | N/A        | N/A           | N/A   | N/A        |
| S1 1:20         | 0.011     | 0.009 | <b>112</b> | 0.033     | N/A   | N/A        | 0.043         | N/A   | N/A        |
| S1 1:40         | 0.005     | 0.005 | <b>102</b> | 0.014     | 0.016 | <b>87</b>  | 0.019         | 0.022 | <b>88</b>  |
| S1 1:80         | LOW       | 0.002 | N/A        | 0.007     | 0.008 | <b>91</b>  | N/A           | N/A   | N/A        |
| <b>Sample 2</b> |           |       |            |           |       |            |               |       |            |
| S2              | HIGH      |       |            | HIGH      |       |            |               |       |            |
| S2 1:2          | HIGH      | N/A   | N/A        | HIGH      | N/A   | N/A        | N/A           | N/A   | N/A        |
| S2 1:4          | 0.030     | N/A   | N/A        | HIGH      | N/A   | N/A        | N/A           | N/A   | N/A        |
| S2 1:10         | 0.013     | 0.012 | <b>106</b> | HIGH      | N/A   | N/A        | N/A           | N/A   | N/A        |
| S2 1:20         | 0.005     | 0.006 | <b>89</b>  | 0.028     | N/A   | N/A        | 0.033         | N/A   | N/A        |
| S2 1:40         | 0.003     | 0.003 | <b>92</b>  | 0.014     | 0.014 | <b>104</b> | 0.017         | 0.017 | <b>104</b> |
| S2 1:80         | LOW       | 0.002 | N/A        | 0.007     | 0.007 | <b>100</b> | N/A           | N/A   | N/A        |
| <b>Sample 3</b> |           |       |            |           |       |            |               |       |            |
| S3              | HIGH      |       |            | HIGH      |       |            |               |       |            |
| S3 1:2          | 0.033     | N/A   | N/A        | HIGH      | N/A   | N/A        | N/A           | N/A   | N/A        |
| S3 1:4          | 0.017     | 0.016 | <b>103</b> | HIGH      | N/A   | N/A        | N/A           | N/A   | N/A        |
| S3 1:10         | 0.007     | 0.007 | <b>107</b> | 0.032     | N/A   | N/A        | 0.039         | N/A   | N/A        |
| S3 1:20         | 0.003     | 0.003 | <b>93</b>  | 0.017     | 0.016 | <b>105</b> | 0.020         | 0.020 | <b>102</b> |
| S3 1:40         | LOW       | 0.002 | N/A        | 0.009     | 0.008 | <b>109</b> | N/A           | N/A   | N/A        |
| S3 1:80         | LOW       | 0.001 | N/A        | 0.005     | 0.004 | <b>112</b> | N/A           | N/A   | N/A        |
| <b>Sample 4</b> |           |       |            |           |       |            |               |       |            |
| S4              | HIGH      |       |            | HIGH      |       |            |               |       |            |
| S4 1:2          | 0.048     | N/A   | N/A        | HIGH      | N/A   | N/A        | N/A           | N/A   | N/A        |
| S4 1:4          | 0.028     | 0.024 | <b>117</b> | HIGH      | N/A   | N/A        | N/A           | N/A   | N/A        |
| S4 1:10         | 0.011     | 0.010 | <b>117</b> | 0.028     | N/A   | N/A        | 0.039         | N/A   | N/A        |
| S4 1:20         | 0.005     | 0.005 | <b>99</b>  | 0.013     | 0.014 | <b>96</b>  | 0.018         | 0.019 | <b>93</b>  |
| S4 1:40         | LOW       | 0.002 | N/A        | 0.007     | 0.007 | <b>102</b> | N/A           | N/A   | N/A        |
| S4 1:80         | LOW       | 0.001 | N/A        | 0.003     | 0.003 | <b>101</b> | N/A           | N/A   | N/A        |

## S2 Table Continued

|               | D-lactate |       |           | L-lactate |       |               | total lactate |       |            |
|---------------|-----------|-------|-----------|-----------|-------|---------------|---------------|-------|------------|
| <b>Sample</b> | O         | E     | OE%       | O         | E     | OE%           | O             | E     | OE%        |
| <b>5</b>      |           |       |           |           |       |               |               |       |            |
| S5            | 0.044     |       |           | HIGH      |       |               |               |       |            |
| S5 1:2        | 0.020     | 0.022 | <b>89</b> | 0.044     | N/A   | N/A           | 0.064         | N/A   | N/A        |
| S5 1:4        | 0.011     | 0.011 | <b>96</b> | 0.020     | 0.022 | <b>91</b>     | 0.031         | 0.032 | <b>96</b>  |
| S5 1:10       | LOW       | 0.004 | N/A       | 0.008     | 0.009 | <b>89</b>     | N/A           | N/A   | N/A        |
| S5 1:20       | LOW       | 0.002 | N/A       | 0.004     | 0.004 | <b>96</b>     | N/A           | N/A   | N/A        |
| S5 1:40       | LOW       | 0.001 | N/A       | LOW       | 0.002 | N/A           | N/A           | N/A   | N/A        |
| S5 1:80       | LOW       | 0.001 | N/A       | LOW       | 0.001 | N/A           | N/A           | N/A   | N/A        |
| <b>Sample</b> |           |       |           |           |       |               |               |       |            |
| <b>6</b>      |           |       |           |           |       |               |               |       |            |
| S6            | 0.007     |       |           | 0.027     |       |               | 0.034         |       |            |
| S6 1:2        | 0.003     | 0.004 | <b>93</b> | 0.014     | 0.013 | <b>102</b>    | 0.017         | 0.017 | <b>101</b> |
| S6 1:4        | LOW       | 0.002 | N/A       | 0.007     | 0.007 | <b>111</b>    | N/A           | N/A   | N/A        |
| S6 1:10       | LOW       | 0.001 | N/A       | 0.003     | 0.003 | <b>109</b>    | N/A           | N/A   | N/A        |
| S6 1:20       | LOW       | 0.000 | N/A       | LOW       | 0.001 | N/A           | N/A           | N/A   | N/A        |
| S6 1:40       | LOW       | 0.000 | N/A       | LOW       | 0.001 | N/A           | N/A           | N/A   | N/A        |
| S6 1:80       | LOW       | 0.000 | N/A       | LOW       | 0.000 | N/A           | N/A           | N/A   | N/A        |
| <b>Sample</b> |           |       |           |           |       |               |               |       |            |
| <b>7</b>      |           |       |           |           |       |               |               |       |            |
| S7            | 0.011     |       |           | 0.020     |       |               | 0.031         |       |            |
| S7 1:2        | 0.005     | 0.005 | <b>92</b> | 0.010     | 0.010 | <b>101</b>    | 0.015         | 0.015 | <b>98</b>  |
| S7 1:4        | LOW       | 0.003 | N/A       | 0.005     | 0.005 | <b>100</b>    | N/A           | N/A   | N/A        |
| S7 1:10       | LOW       | 0.001 | N/A       | LOW       | 0.002 | N/A           | N/A           | N/A   | N/A        |
| S7 1:20       | LOW       | 0.001 | N/A       | LOW       | 0.001 | N/A           | N/A           | N/A   | N/A        |
| S7 1:40       | LOW       | 0.000 | N/A       | LOW       | 0.000 | N/A           | N/A           | N/A   | N/A        |
| S7 1:80       | LOW       | 0.000 | N/A       | LOW       | 0.000 | N/A           | N/A           | N/A   | N/A        |
| D-lactate     |           |       | L-lactate |           |       | total lactate |               |       |            |
| <b>min</b>    | 92        |       | 89        |           | 88    |               |               |       |            |
| <b>max</b>    | 111       |       | 109       |           | 104   |               |               |       |            |
| <b>mean</b>   | 99        |       | 100       |           | 97    |               |               |       |            |
| <b>SD</b>     | 7         |       | 7         |           | 5     |               |               |       |            |

O = observed lactate concentration (g/L), E = expected lactate concentration (g/L),  
OE% = observed-to-expected ratio.
