# Supplementary material for: Altered microbiota, fecal lactate, and fecal bile acids in dogs with gastrointestinal disease
Source: PLOS journal article supplement (doi:10.1371/journal.pone.0224454), 2019-10-31
Supplement: S8 (10.1371/journal.pone.0224454.s008) [file journal.pone.0224454.s008]

**S5 Table.** Inter-assay variability of seven canine fecal samples. Coefficients of variation are in bold and the minimum, maximum, mean, and standard deviation of these coefficients of variation are provided in the box at the end of the table.

|                         |          |                  |                      |           |           |           |           |
|-------------------------|----------|------------------|----------------------|-----------|-----------|-----------|-----------|
| sample                  | 1        | 2                | 3                    | 4         | 5         | 6         | 7         |
| number of repeats       | 8        | 7*               | 8                    | 8         | 8         | 8         | 8         |
| <b>D-lactate</b>        |          |                  |                      |           |           |           |           |
| mean (mM)               | 75       | 106              | 20                   | 29        | 15        | 3         | 4         |
| standard deviation (mM) | 4        | 6                | 7                    | 8         | 1         | 2         | 1         |
| <b>% CV</b>             | <b>6</b> | <b>5</b>         | <b>32</b>            | <b>29</b> | <b>5</b>  | <b>56</b> | <b>31</b> |
| <b>L-lactate</b>        |          |                  |                      |           |           |           |           |
| mean (mM)               | 233      | 224              | 143                  | 76        | 30        | 7         | 7         |
| standard deviation (mM) | 12       | 21               | 19                   | 15        | 3         | 4         | 2         |
| <b>% CV</b>             | <b>5</b> | <b>10</b>        | <b>13</b>            | <b>20</b> | <b>11</b> | <b>55</b> | <b>28</b> |
| <b>total lactate</b>    |          |                  |                      |           |           |           |           |
| mean (mM)               | 309      | 331              | 163                  | 105       | 45        | 10        | 12        |
| standard deviation (mM) | 16       | 24               | 18                   | 23        | 4         | 5         | 3         |
| <b>% CV</b>             | <b>5</b> | <b>7</b>         | <b>11</b>            | <b>22</b> | <b>8</b>  | <b>54</b> | <b>28</b> |
|                         |          |                  |                      |           |           |           |           |
| <b>D-lactate</b>        |          | <b>L-lactate</b> | <b>total lactate</b> |           |           |           |           |
| <b>min</b>              | 5        | 5                | 5                    |           |           |           |           |
| <b>max</b>              | 56       | 55               | 54                   |           |           |           |           |
| <b>mean</b>             | 23       | 20               | 19                   |           |           |           |           |
| <b>SD</b>               | 18       | 16               | 16                   |           |           |           |           |

\*one repeat was thrown out due to pipetting error  
 %CV = coefficient of variation, SD = standard deviation.
